# Supplementary material for: 3D printing nacre powder/sodium alginate scaffold loaded with PRF promotes bone tissue repair and regeneration
Source: Royal Society of Chemistry journal article supplement (doi:10.1039/d3bm01936e), 2024-01-01
Supplement: d3bm01936e1.pdf [file d3bm01936e1.pdf]

**Electronic Supplementary Material (ESI) for Biomaterials Science.**

**This journal is © The Royal Society of Chemistry 2023**

## **Supporting Information**

### **3D printing nacre powder/sodium alginate scaffold loaded with PRF promotes bone tissue repair and regeneration**

Bin Liu, ‡<sup>a,b</sup> Cewen Hu, ‡<sup>a</sup> Xinyue Huang, <sup>a</sup> Kaiqi Qin, <sup>a</sup> Lei Wang, <sup>a</sup> Zhilong Wang, <sup>a</sup>  
Jiachen Liang, <sup>a</sup> Fuqiang Xie, <sup>\*,a,b</sup> Zengjie Fan, <sup>\*,a</sup>

<sup>a</sup> Key Laboratory of Dental Maxillofacial Reconstruction and Biological Intelligence Manufacturing, Gansu Province, School of Stomatology, Lanzhou University, Lanzhou 730000, P. R. China

<sup>b</sup> Department of Oral and Maxillofacial Surgery, 2nd Hospital of Lanzhou University, Lanzhou 730030, P. R. China

\* Correspondence Authors:

Fuqiang Xie, email address: lzu\_xiefj@lzu.edu.cn, phone: +8613679471811.

Zengjie Fan, email address: zjfan@lzu.edu.cn, phone: +8613919268875.

‡These two authors contributed equally to this study.

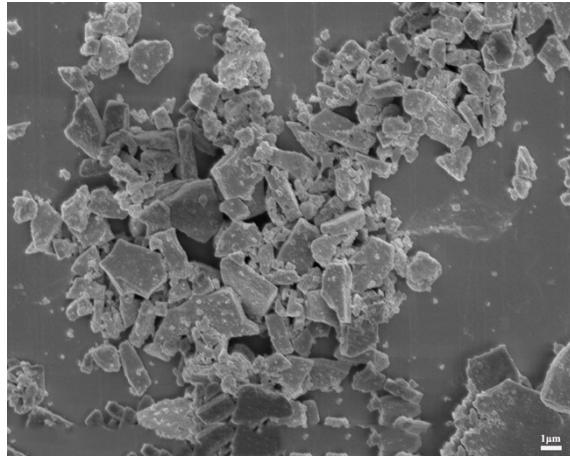

**Fig. S1: TEM image of NP (magnification: 8000×, scale bar= 1 μm)**

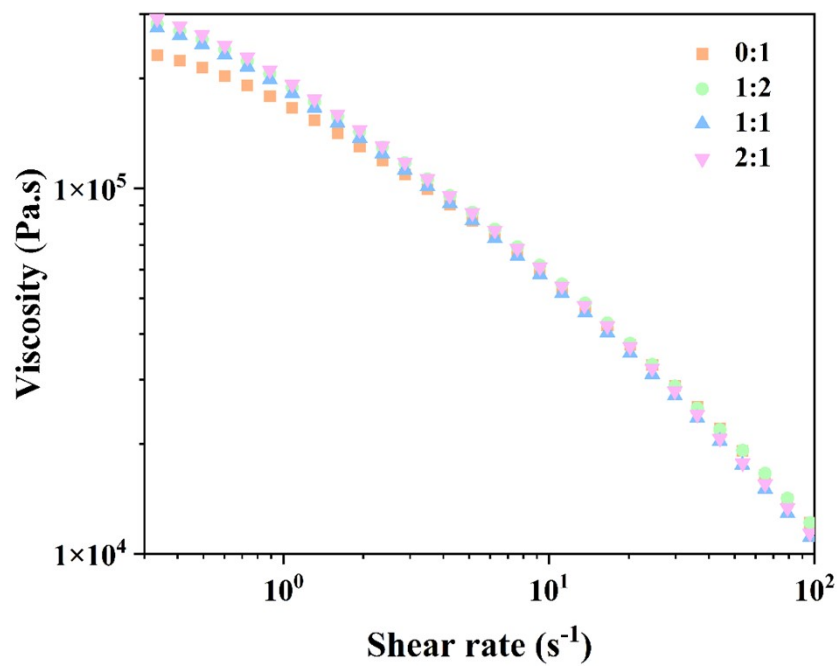

Fig. S2: Viscosity of NP/SA (0:1), NP/SA (1:2), NP/SA (1:1) and NP/SA (2:1) printable bio-inks.

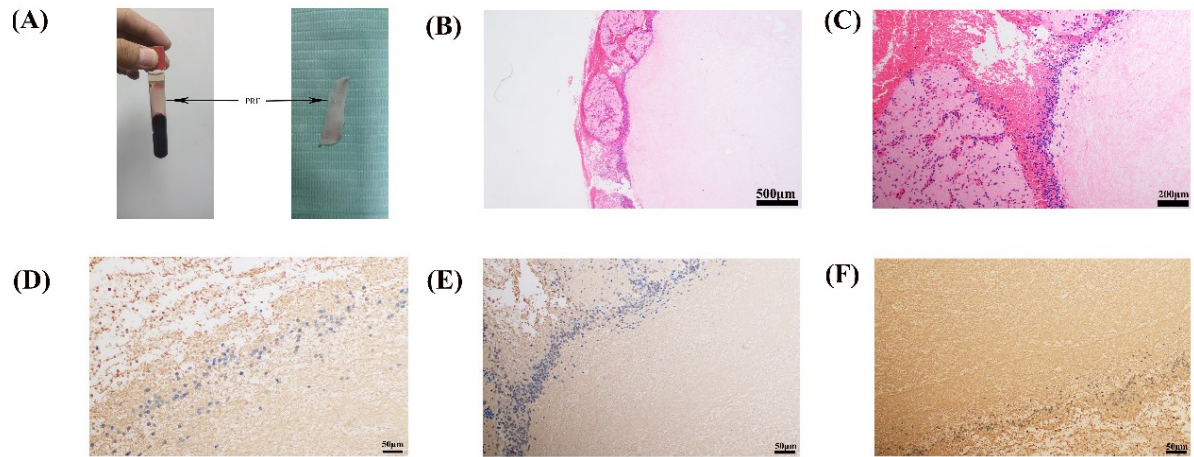

**Fig. S3: The organizational structure of PRF**

- A) PRF obtained from the middle layer after whole blood centrifugation. B, C) H&E staining of PRF. D-F) Immunohistochemistry staining (PDGF, TGF- $\beta_1$ , VEGF) of PRF.

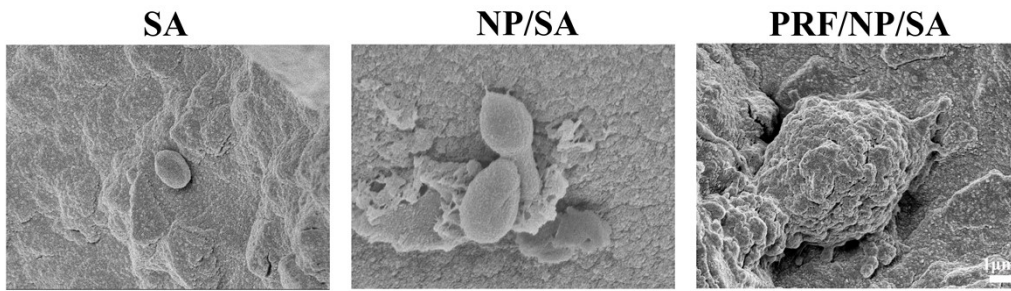

**Fig. S4: Representative SEM images of rBMSCs adhesion and spreading**

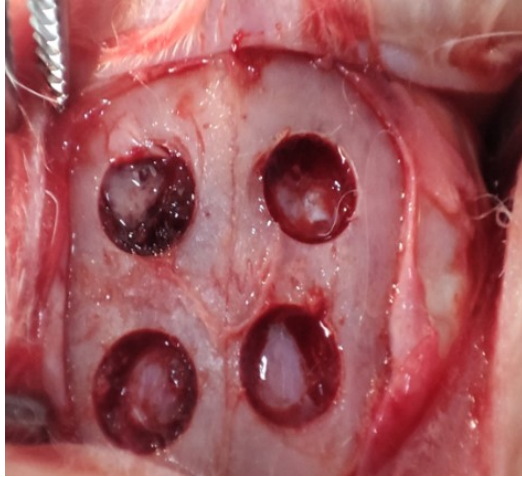

**Fig. S5: Skull defect model of New Zealand rabbits (diameter = 6 mm)**
